# Supplementary material
Source: PubMed Central journal article supplement (PMC3589895)
Supplement: Supp_Fig1.pdf [file Supp_Fig1.pdf]

## Supplementary Data

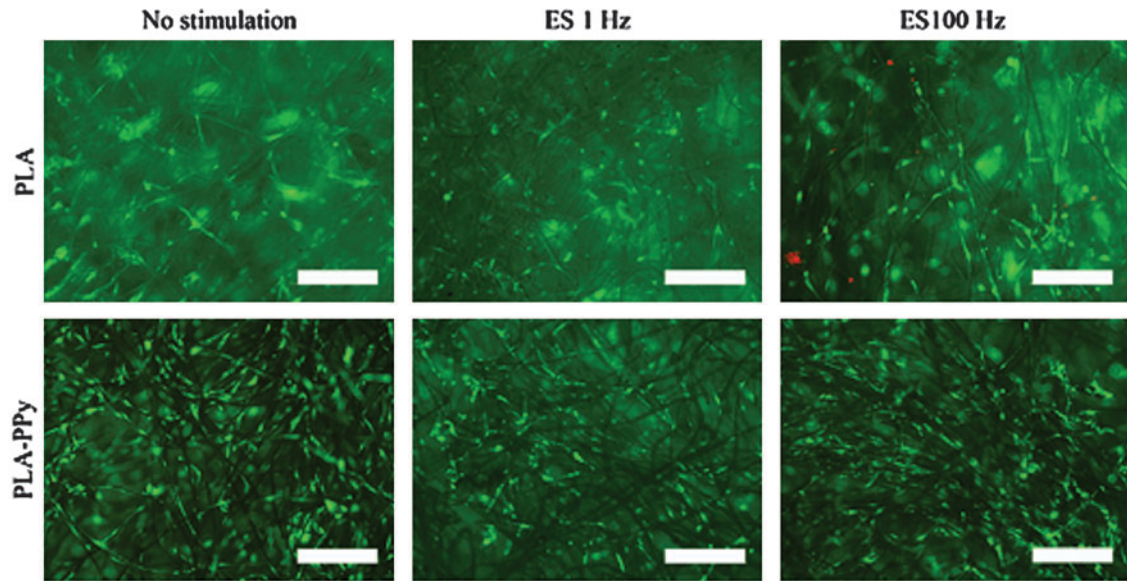

SUPPLEMENTARY FIG. S1. Live/dead images from the bottom of the scaffolds. Scale bar 500  $\mu\text{m}$ .
