# Supplementary material
Source: PubMed Central journal article supplement (PMC3589895)

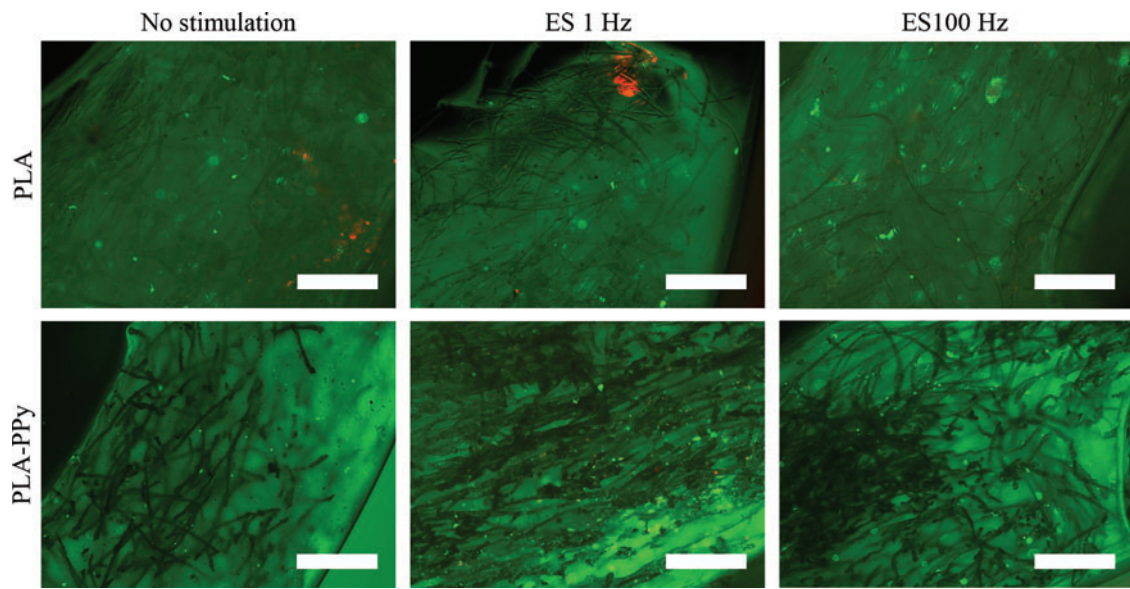

**SUPPLEMENTARY FIG. S2.** Live/dead images from the split scaffolds. Scale bar 500  $\mu\text{m}$ .

Supplement: Supp_Fig2.pdf [file Supp_Fig2.pdf]
